# Supplementary material for: Biomarkers for Pregnancy Latency Prediction after Preterm Premature Rupture of Membranes–A Systematic Review
Source: MDPI journal article supplement (doi:10.3390/ijms24098027), 2023-04-28
Supplement: s1 [file s1]

| Authors                            | A - Selection | Exposed truly representative of average | Selection of non-exposed from the same community | Exposure of ascertained by secure record or interview | Demonstration of outcome of interest not present at the start of the study | B - Comparability | Study controls for other variables | C - Outcome | Follow up long enough for outcome to occur | Complete follow up of all subjects accounted for | Subject to follow up unlikely to introduce biases | Assessment of outcomes | Score |
|------------------------------------|---------------|-----------------------------------------|--------------------------------------------------|-------------------------------------------------------|----------------------------------------------------------------------------|-------------------|------------------------------------|-------------|--------------------------------------------|--------------------------------------------------|---------------------------------------------------|------------------------|-------|
| Kim et al. (2020) [22]             |               | 1                                       | 1                                                | 1                                                     | 1                                                                          |                   | 1                                  |             | 1                                          | 1                                                | 1                                                 | 1                      | 9     |
| Ronzoni et al. (2019) [23]         |               | 0                                       | 1                                                | 1                                                     | 1                                                                          |                   | 1                                  |             | 1                                          | 1                                                | 1                                                 | 0                      | 7     |
| Ronzoni et al. (2019) [24]         |               | 1                                       | 1                                                | 1                                                     | 1                                                                          |                   | 0                                  |             | 1                                          | 1                                                | 1                                                 | 1                      | 8     |
| Ryu et al. (2017) [25]             |               | 1                                       | 0                                                | 0                                                     | 1                                                                          |                   | 0                                  |             | 1                                          | 1                                                | 1                                                 | 0                      | 5     |
| Gezer et al. (2017) [26]           |               | 1                                       | 1                                                | 1                                                     | 1                                                                          |                   | 1                                  |             | 1                                          | 1                                                | 1                                                 | 1                      | 9     |
| Nergiz Avcioğlu et al. (2015) [27] |               | 1                                       | 1                                                | 1                                                     | 1                                                                          |                   | 1                                  |             | 1                                          | 1                                                | 1                                                 | 1                      | 9     |
| Tigga and Malik (2015) [28]        |               | 1                                       | 1                                                | 0                                                     | 1                                                                          |                   | 1                                  |             | 1                                          | 1                                                | 1                                                 | 1                      | 8     |
| Rahkonen et al. (2010) [29]        |               | 1                                       | 1                                                | 0                                                     | 1                                                                          |                   | 1                                  |             | 1                                          | 1                                                | 1                                                 | 0                      | 7     |
